# Supplementary material
Source: Elsevier journal article supplement (https://www.sciencedirect.com/science/article/pii/S0211699522001102)
Supplement: mmc1 [file S0211699522001102:mmc1.doc]

Table S1. Follow-up variables: results of ratification by S.E.N. expert panel.

| **FOLLOW-UP VARIABLES** | | **All**  **(%)** | **Pre-ESKD**  **(%)** | **CC**  **(%)** | **HD**  **(%)** | **PD**  **(%)** | **KT**  **(%)** |
| --- | --- | --- | --- | --- | --- | --- | --- |
| **ESSENTIAL** | | | | | | | | |
| **Burden of disease** | **Patient survival** | 100.00 | - | - | - | - | - |
| **Hospitalizations** | 96.72 | - | - | - | - | - |
| **Cardiovascular events** | 96.72 | - | - | - | - | - |
| **Smoking status** | - | 93.44 | 98.36 | 93.44 | 93.44 | 93.44 |
| **HRQoL** | **HRQoL** | 90.16 | - | - | - | - | - |
| **Pain** | 80.33 | - | - | - | - | - |
| **Fatigue** | 73.77 | - | - | - | - | - |
| **Physical function** | 83.61 | - | - | - | - | - |
| **Daily activities** | 90.16 | - | - | - | - | - |
| **Depression** | 85.25 | - | - | - | - | - |
| **Treatment-related** | **Residual kidney function / residual diuresis / allogeneic function** | - | 100.0 | 93.44 | 77.05 | 78.69 | 96.72 |
| **Albuminuria** | - | 93.44 | 60.66 | 39.34 | 45.90 | 91.80 |
| **Hemoglobin** | - | 93.44 | 98.36 | 93.44 | 93.44 | 93.44 |
| **Peritonitis** | - | - | - | - | 95.08 | - |
| **Infection/Bacteremia** | - | 55.74 | 60.66 | 85.25 | 72.13 | 70.49 |
| **Vascular access survival** | - | - | - | 86.89 | - | - |
| **Vascular access type** | - | - | - | 91.80 | - | - |
| **PD modality survival** | - | - | - | - | 88.52 | - |
| **Acute rejection** | - | - | - | - | - | 96.72 |
| **Cancer** | - | 88.52 | 85.25 | 90.16 | 90.16 | 91.80 |
| **OPTIONAL** | | | | | | | | |
| **Treatment-related** | **Potassium** | - | 95.08 | 93.44 | 95.08 | 95.08 | 93.44 | |
| **Nutritional state** | - | 95.08 | 90.16 | 95.08 | 95.08 | 95.08 | |
| **Arterial pressure** | - | 95.08 | 93.44 | 95.08 | 95.08 | 93.44 | |
| **Diabetes control** | - | 96.72 | 95.08 | 95.08 | 95.08 | 96.72 | |
| **Phosphorus** | - | 93.44 | 90.16 | 95.08 | 95.08 | 91.80 | |
| **Calcium** | - | 95.08 | 91.80 | 96.72 | 96.72 | 93.44 | |
| **Vitamin D** | - | 86.89 | 80.33 | 85.25 | 85.25 | 83.61 | |
| **Vascular access complications** | - | - | - | 90.16 | - | - | |

*Blue, Essential variables; Orange, optional variables; pre-ESKD, advanced stage with High Risk of Progressive* CKD*, CC, conservative care; PD, peritoneal dialysis; HD, hemodialysis; KT, kidney transplantation; HRQoL, Health-related quality of life.*

Table S2. Case-mix variables: results of ratification by S.E.N. expert panel.

| **CASE-MIX VARIABLES** | **All**  **(%)** | **Pre-SKD**  **(%)** | **CC**  **(%)** | **HD**  **(%)** | **PD**  **(%)** | **KT**  **(%)** |
| --- | --- | --- | --- | --- | --- | --- |
| **ESSENTIAL** | | | | | | | |
| **Age** | - | 100.00 | 100.00 | 100.00 | 100.00 | 100.00 |
| **Sex** | - | 100.00 | 100.00 | 100.00 | 100.00 | 100.00 |
| **Education level** | - | 86.89 | 85.25 | 88.52 | 90.16 | 86.89 |
| **Comorbidity** | - | 96.72 | 95.08 | 98.36 | 96.72 | 96.72 |
| **Smoking status** | - | 100 | 96.72 | 100 | 100 | 100 |
| **Obesity** | - | 98.36 | 93.44 | 96.72 | 96.72 | 93.44 |
| **Primary kidney disease** | - | 100 | 93.44 | 93.44 | 93.44 | 95.08 |
| **Kidney basal function (eGFR)** | - | 100 | 85.25 | 80.33 | 83.61 | 96.72 |
| **Albuminuria** | - | 96.72 | 72.13 | 63.93 | 70.49 | 90.16 |
| **Type of substitutive kidney treatment** | - | 88.52 | 80.33 | 88.52 | 88.52 | 90.16 |
| **Vascular access type** | - | - | - | 90.16 | - | - |
| **Type of transplantation** | - | - | - | - | - | 83.61 |
| **OPTIONAL** | | | | | | | |
| **Vaccine / serological protocol** |  | 86.89 | 67.21 | 91.80 | 85.25 | 86.89 |
| **Time in waiting list** |  | 63.93 | - | 85.25 | 85.25 | 55.74 |

*Blue, Essential variables; Orange, optional variables; pre-ESKD, advanced stage with High Risk of Progressive* CKD*, CC, conservative care; PD, peritoneal dialysis; HD, hemodialysis; KT, kidney transplantation; HRQoL, Health-related quality of life.*
